# Supplementary material
Source: Springer Nature journal article supplement (https://www.springermedizin.de/resource/supplementary/12876_2009_444_MOESM2_ESM.pdf/9437026)
Supplement: MOESM2 [file 9437026]

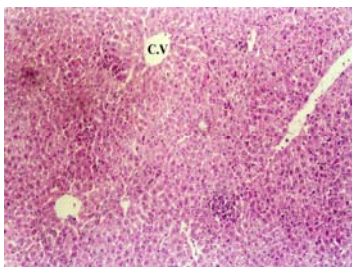

gp. I: Normal control

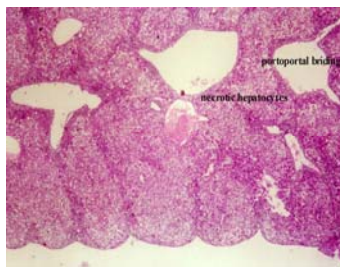

gp.II: TAA

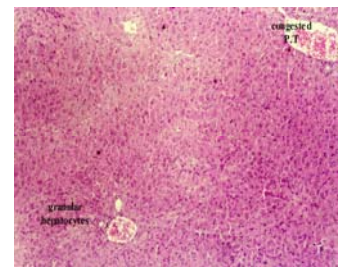

Gp. III: Silymarin during TAA

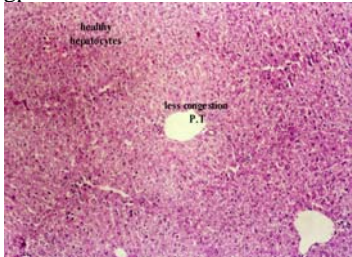

gp IV: Silymarin after TAA

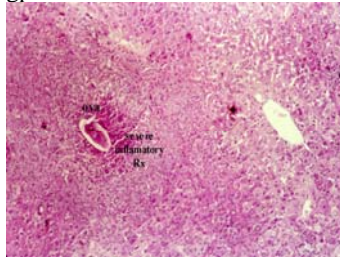

gp. V: *S.mansoni* infected mice.

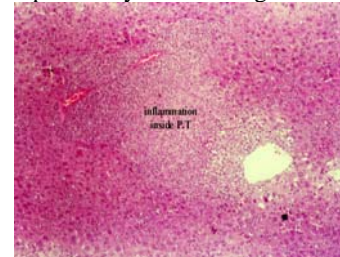

gp.VI: Praziquantel after Schistosomiasis

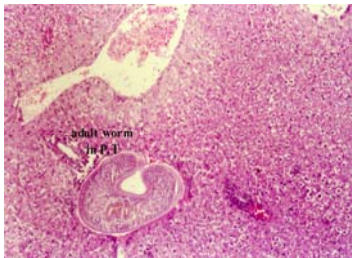

gp. VII: Silymarin during schistosomiasis

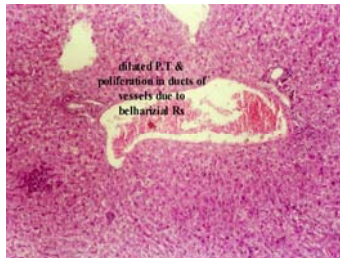

gp. VIII: Silymarin after schistosomiasis

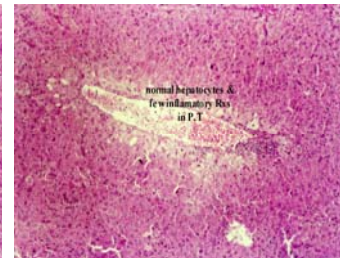

gp IX: Praziquantel and silymarin after chistosomiasis

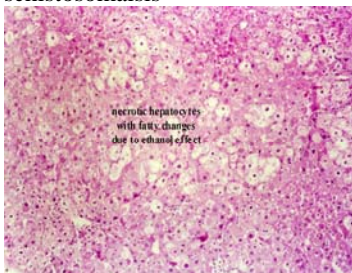

gp X: Ethanol

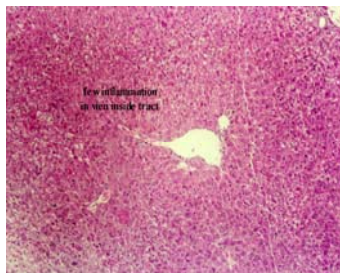

gp XI: silymarin during ethanol .

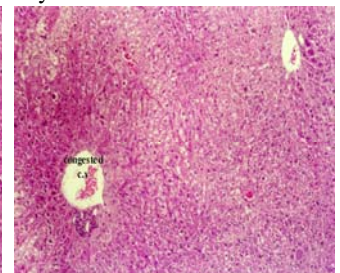

gp XII: silymarin after ethanol
